# Supplementary material
Source: PubMed Central journal article supplement (PMC5666126)
Supplement: AEM.01488-17_zam999118152s1.pdf [file AEM.01488-17_zam999118152s1.pdf]

1  
2  
3  
4  
5  
6  
7  
8  
9  
10  
11  
12  
13  
14  
15  
16  
17  
18  
19  
20  
21  
22  
23  
24  
25  
26

**Supplementary materials**

**Potential of rice stubble as reservoir of bradyrhizobial inoculum in rice-legume crop rotation**

Pongdet Piromyou<sup>1</sup>, Teerana Greetatorn<sup>1</sup>, Kamonluck Teamtisong<sup>2</sup>, Panlada Tittabutr<sup>1</sup>,  
Nantakorn Boonkerd<sup>1</sup>, Neung Teaumroong<sup>1\*</sup>

<sup>1</sup> School of Biotechnology, Institute of Agricultural Technology, Suranaree  
University of Technology, Nakhon Ratchasima, 30000, Thailand

<sup>2</sup> The Center for Scientific and Technological Equipment, Suranaree University of  
Technology, Nakhon Ratchasima 30000, Thailand

27  
28  
29  
30  
31  
32  
33  
34  
35  
36  
37  
38  
39  
40  
41  
42  
43  
44  
45  
46  
47  
48  
49  
50  
51  
52

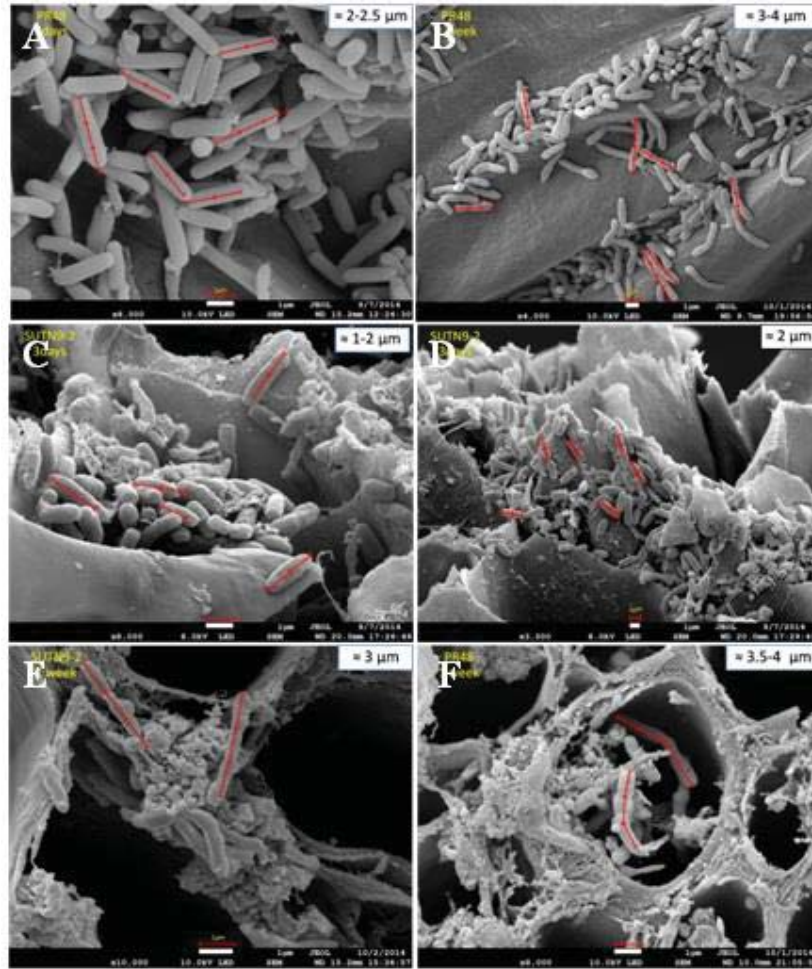

**Fig. S1.** Scanning electron microscope (SEM) images of 3 days of *Bradyrhizobium* sp. SUT-PR48 on surface at 3 DAI (A) and 7 DAI (cell elongation) (B). SUTN9-2 inside rice roots at 3 DAI (C and D), at 7 DAI (E) and SUT-PR48 (F) (cell elongation) The magnification (the enlargement of an image) is the same in panels A, B, C, D, E and F (bar = 1  $\mu$ m).

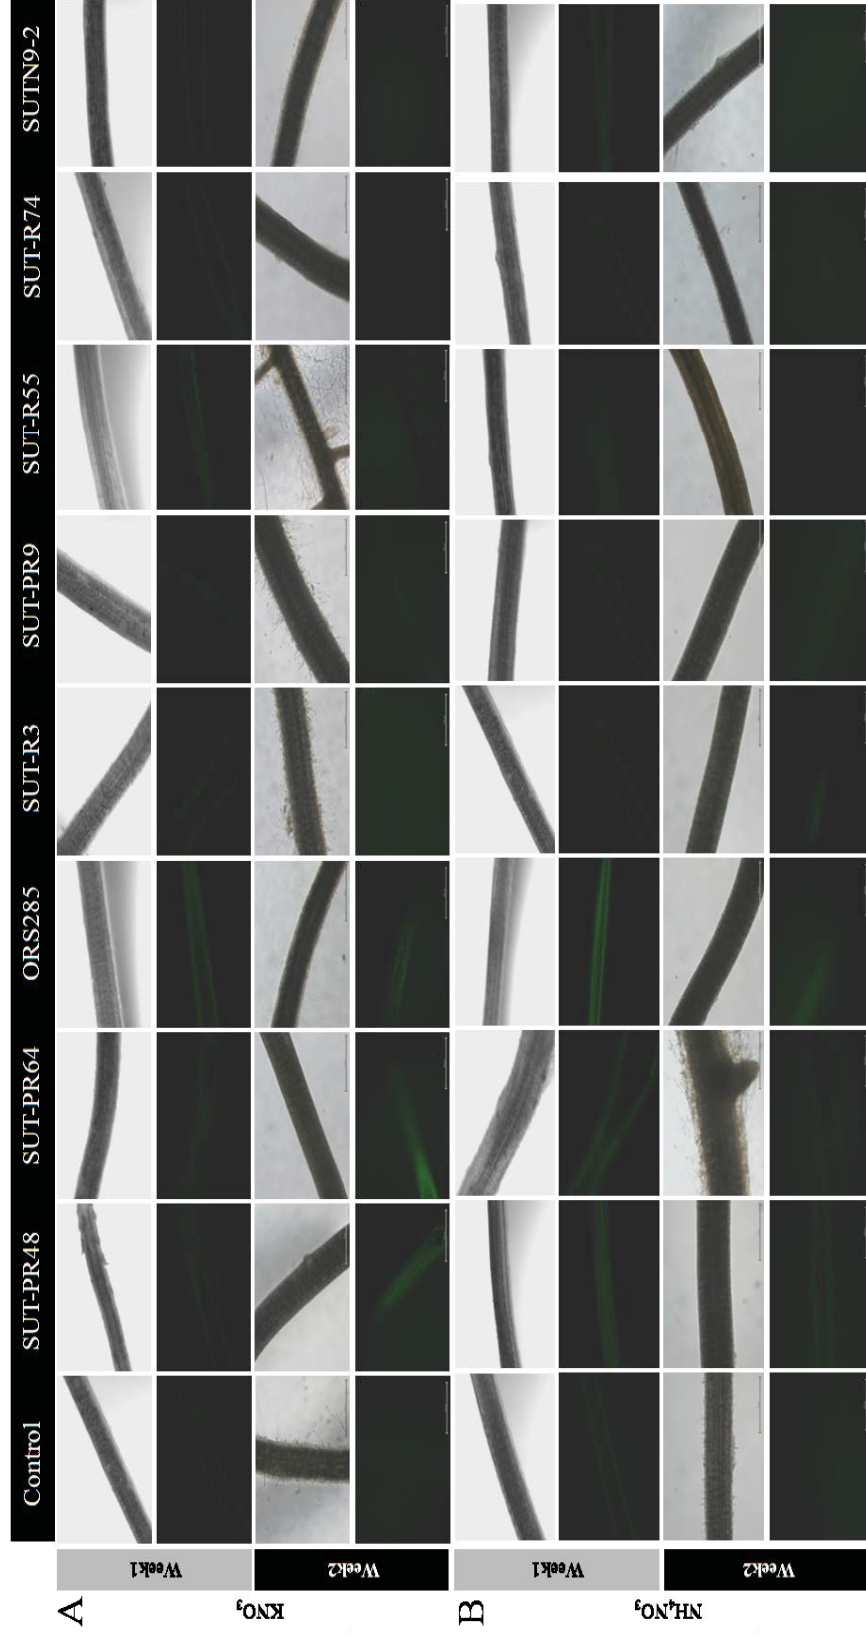

53

54 **Fig. S2.** The production of NO (brightness) in rice roots fed with  $\text{KNO}_3$  (A),  $\text{NH}_4\text{NO}_3$  (B) and urea (C) and inoculated with Bradyrhizobial strains.

55 The NO production was detected by confocal fluorescence microscopy with DAF-FM DA (diaminofluorescein-FM diacetate). Scale bars = 1 mm.

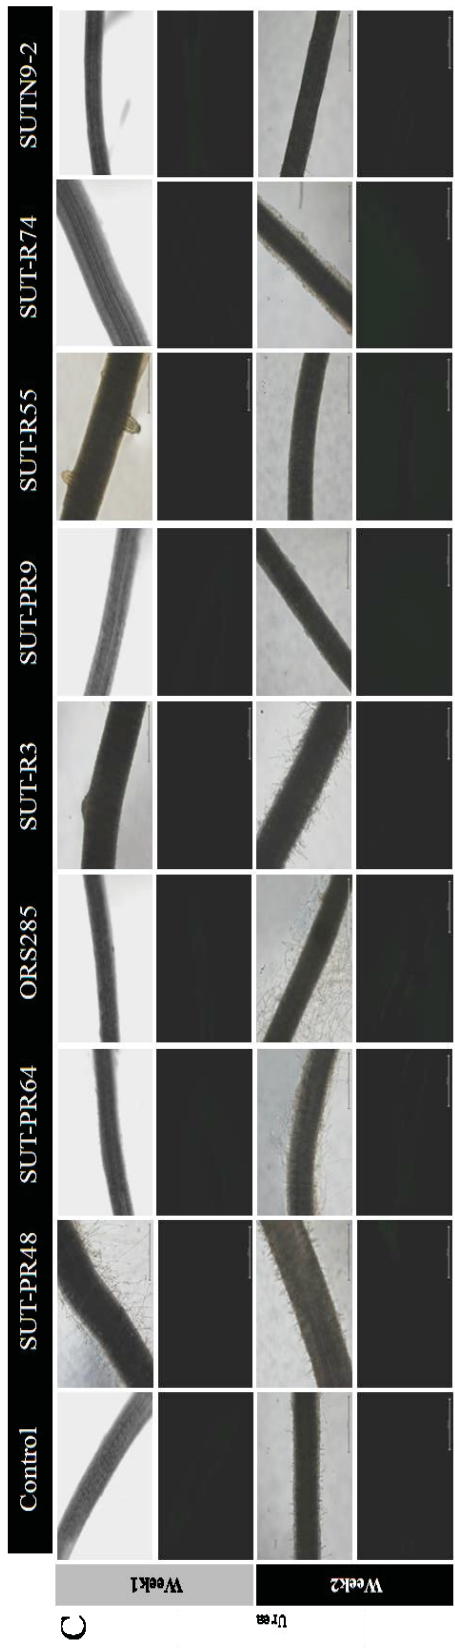

56

57 Fig. S2. (Continued)

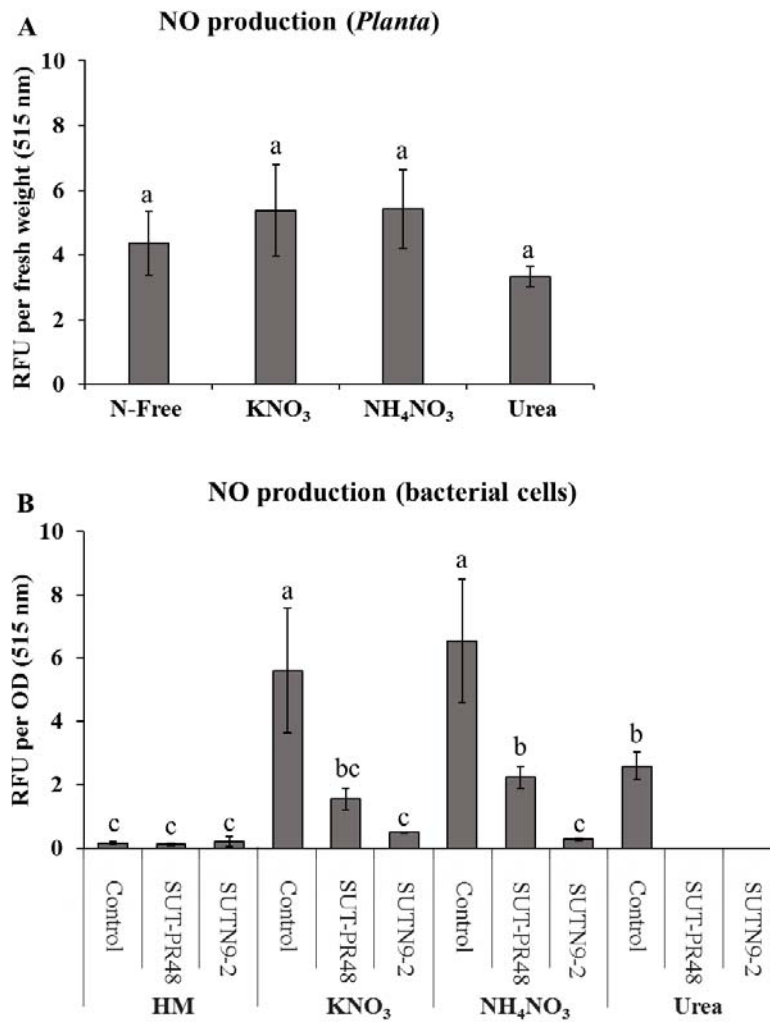

59

60 **Fig. S3.** Quantification of NO production in rice (*O. sativa* PT1) roots and bacterial cells. (A)

61 Relative fluorescence unit (RFU) values per rice root fresh weight at 515 nm were estimated

62 at 1 week. (B) RFU values per OD at 515 nm were estimated at 5 days.

63

64

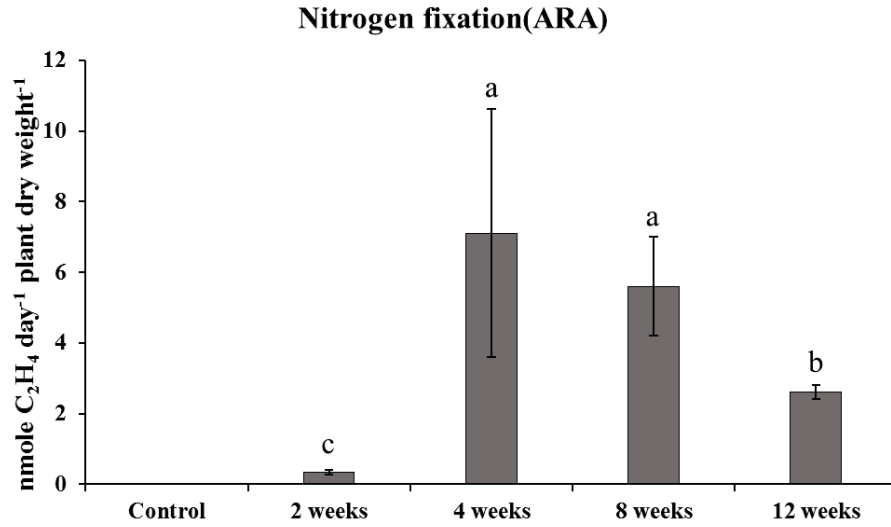

65  
66 **Fig. S4.** Nitrogen-fixation of endophytic bradyrhizobial strain SUTN9-2 in rice tissue.

67

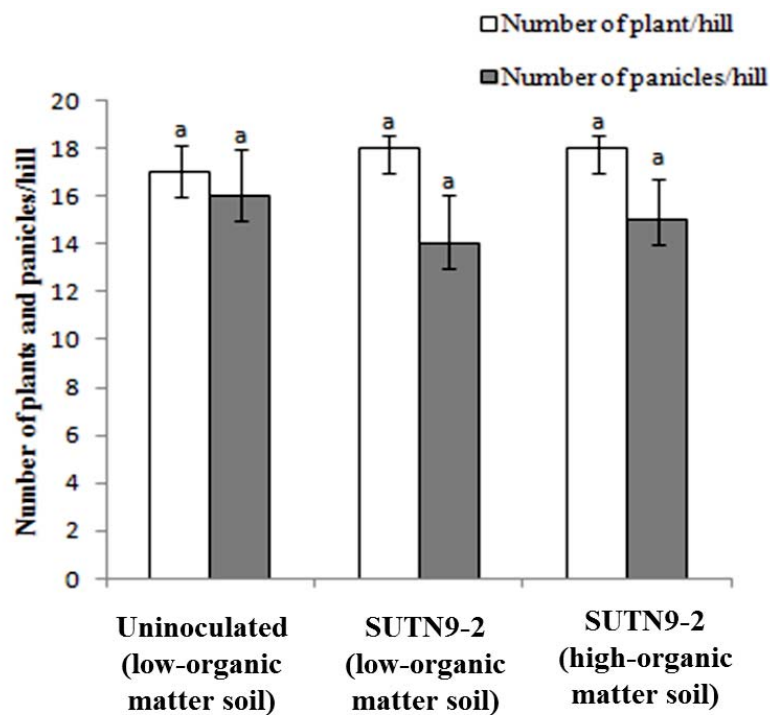

68  
69 **Fig. S5.** Effects of inoculation of rice endophytic bradyrhizobia SUTN9-2 on number of plants  
70 and panicles per hill. Data present the means of the experiment, each with three replicates.  
71 Significant at  $P \leq 0.05$  is indicated by mean standard deviation ( $n=3$ )

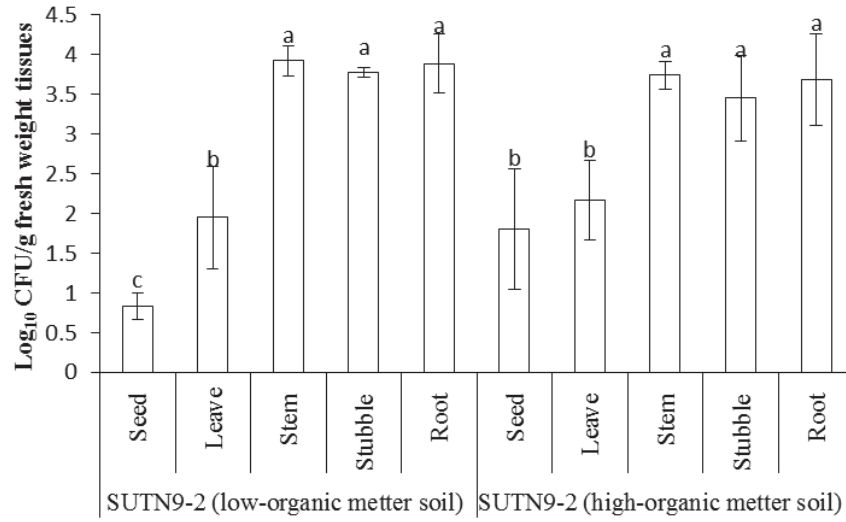

72

73 **Fig. S6.** Population densities of GUS-tagging bradyrhizobium SUTN9-2 in different tissues

74 after rice harvested. Significant at  $P \leq 0.05$  is indicated by mean standard deviation (n=3)
